# Supplementary material for: Protein Kinase A Activation Promotes Cancer Cell Resistance to Glucose Starvation and Anoikis
Source: PubMed Central journal article supplement (PMC4792400; doi:10.1371/journal.pgen.1005931), 2016-03-15
Supplement: pgen.1005931.s002.pdf [file pgen.1005931.s002.pdf]

**NF/N: 496 DEGs ( $\geq 2$  fold change)**  
**Used 480 genes**  
**Medium confidence: 0.400**  
**1938 interactions**

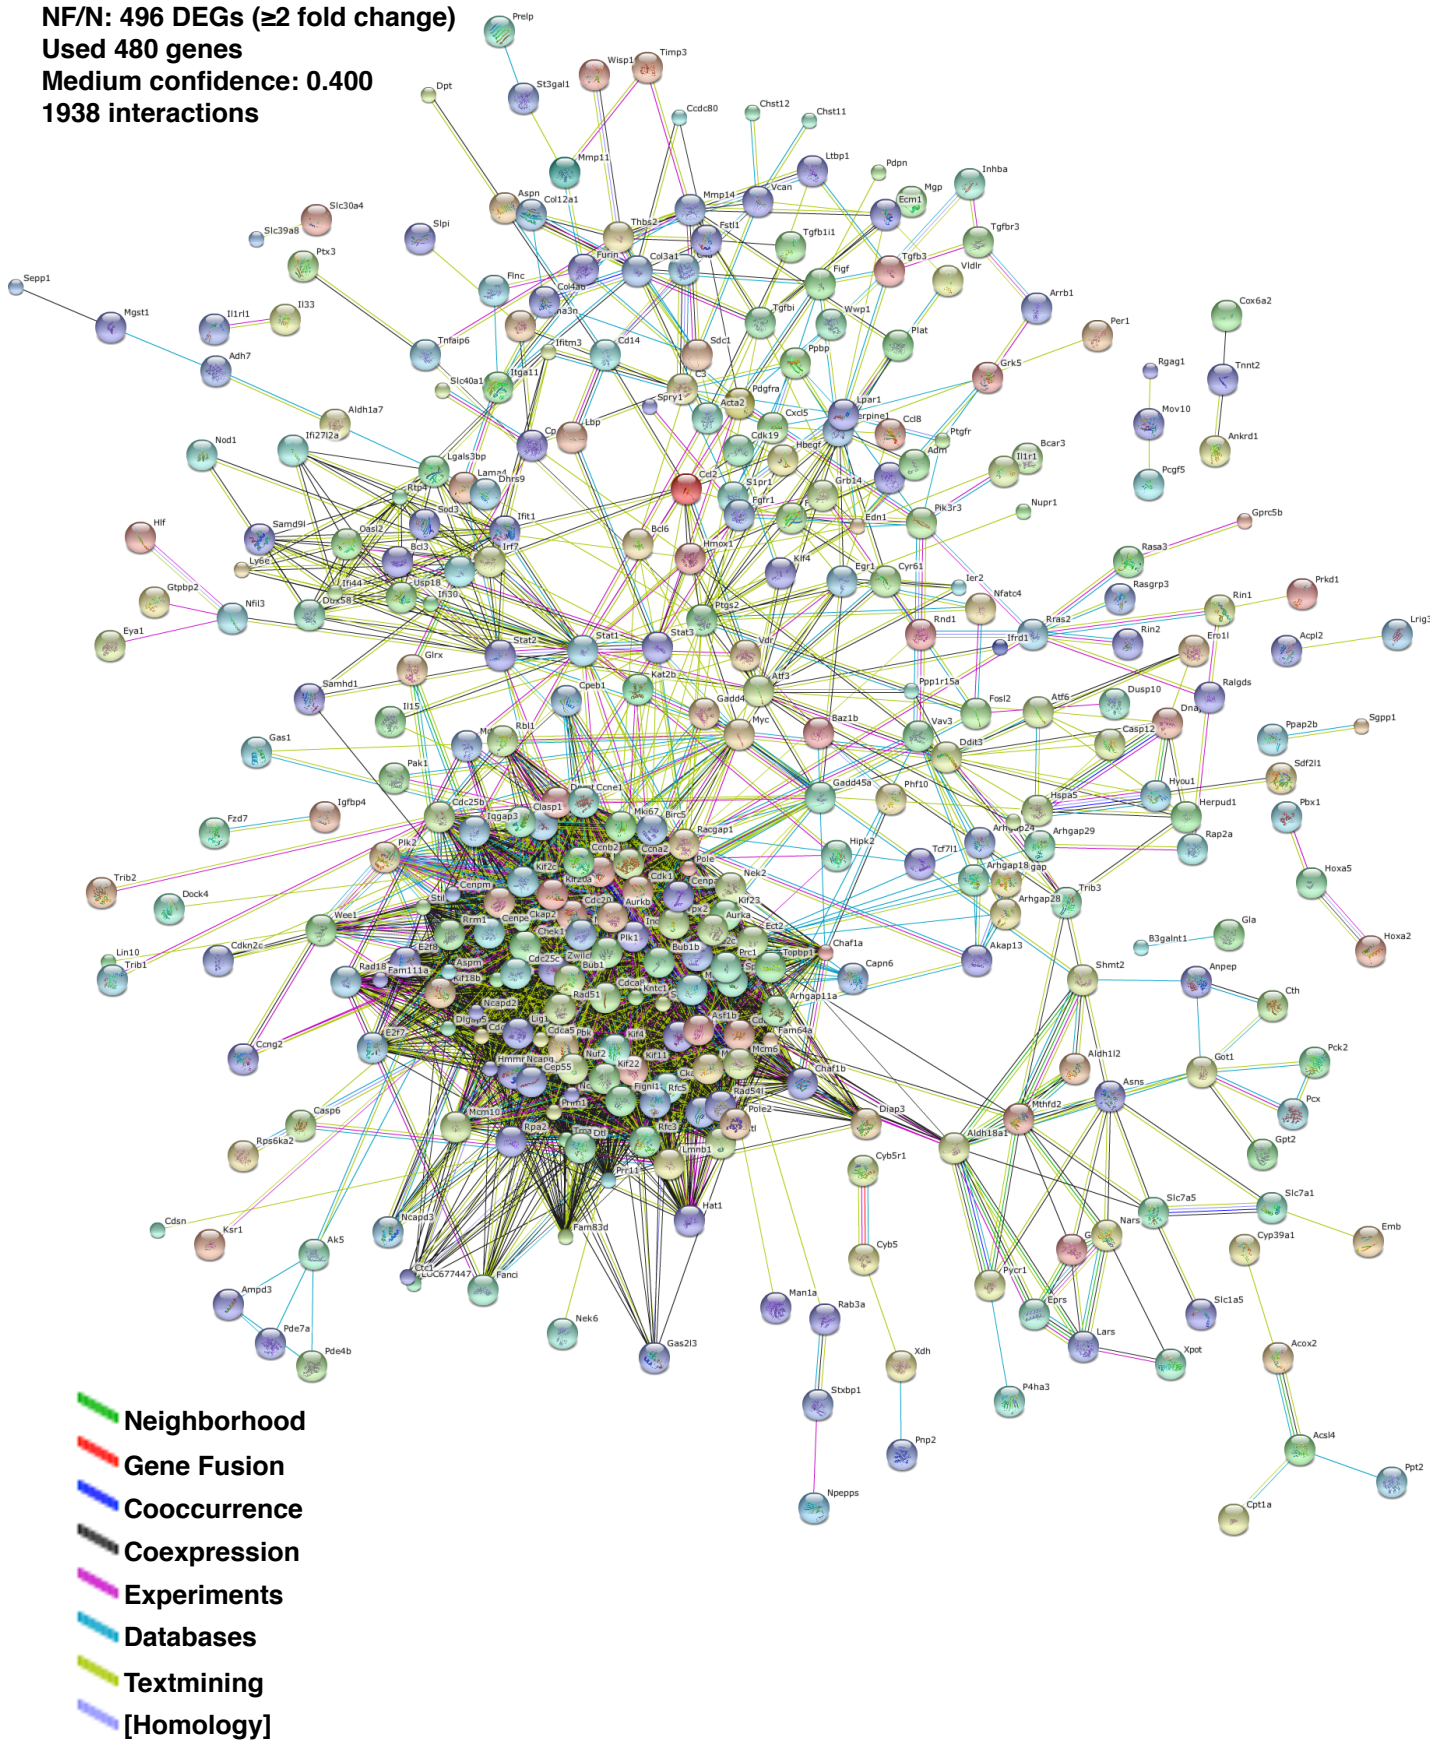

**S2 Fig. The genes regulated by FSK in Normal cells show a high degree of connection.** In the figure the network of predicted associations for all DEGs-encoded proteins in NF/N comparison is shown. The STRING analysis of the protein-protein interactions was performed to DEGs with fold change  $\geq 2$  in the comparison.
