# Supplementary material for: Protein Kinase A Activation Promotes Cancer Cell Resistance to Glucose Starvation and Anoikis
Source: PubMed Central journal article supplement (PMC4792400; doi:10.1371/journal.pgen.1005931), 2016-03-15
Supplement: pgen.1005931.s003.pdf [file pgen.1005931.s003.pdf]

**TF/T: 208 DEGs ( $\geq 2$  fold change)**  
**Used 200 genes**  
**Medium confidence : 0.400**  
**141 interactions**

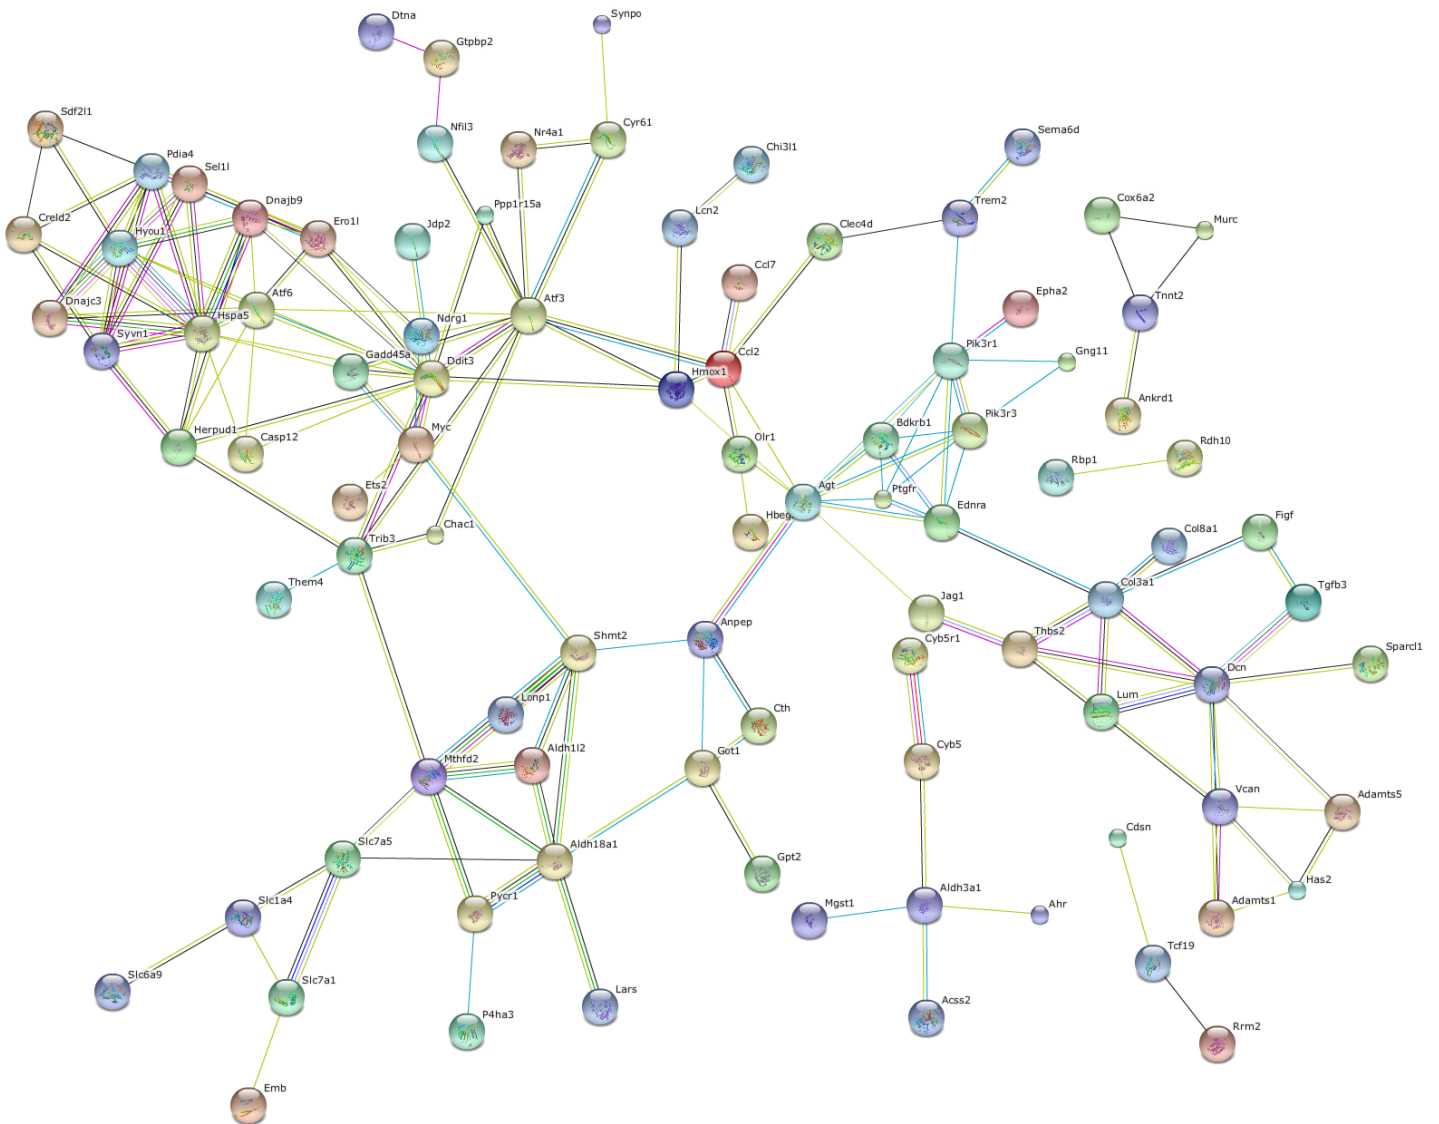

- Neighborhood
- Gene Fusion
- Cooccurrence
- Coexpression
- Experiments
- Databases
- Textmining
- [Homology]

**S3 Fig. The genes regulated by FSK in Transformed cells show a low degree of connection.** In the figure the network of predicted associations for all DEGs-encoded proteins in TF/T comparison is shown. The STRING analysis of the protein-protein interactions was performed to DEGs with fold change  $\geq 2$  in the comparison.
