# Supplementary material for: Protein Kinase A Activation Promotes Cancer Cell Resistance to Glucose Starvation and Anoikis
Source: PubMed Central journal article supplement (PMC4792400; doi:10.1371/journal.pgen.1005931), 2016-03-15
Supplement: pgen.1005931.s004.pdf [file pgen.1005931.s004.pdf]

**A**

**38 Proteins of NF/N with volume spot variation  $\geq 10\%$**   
**Analysis with medium confidence (0.400)**  
**147 observed protein-protein interactions**  
 **$5.35e+1$  expected protein-protein interactions**

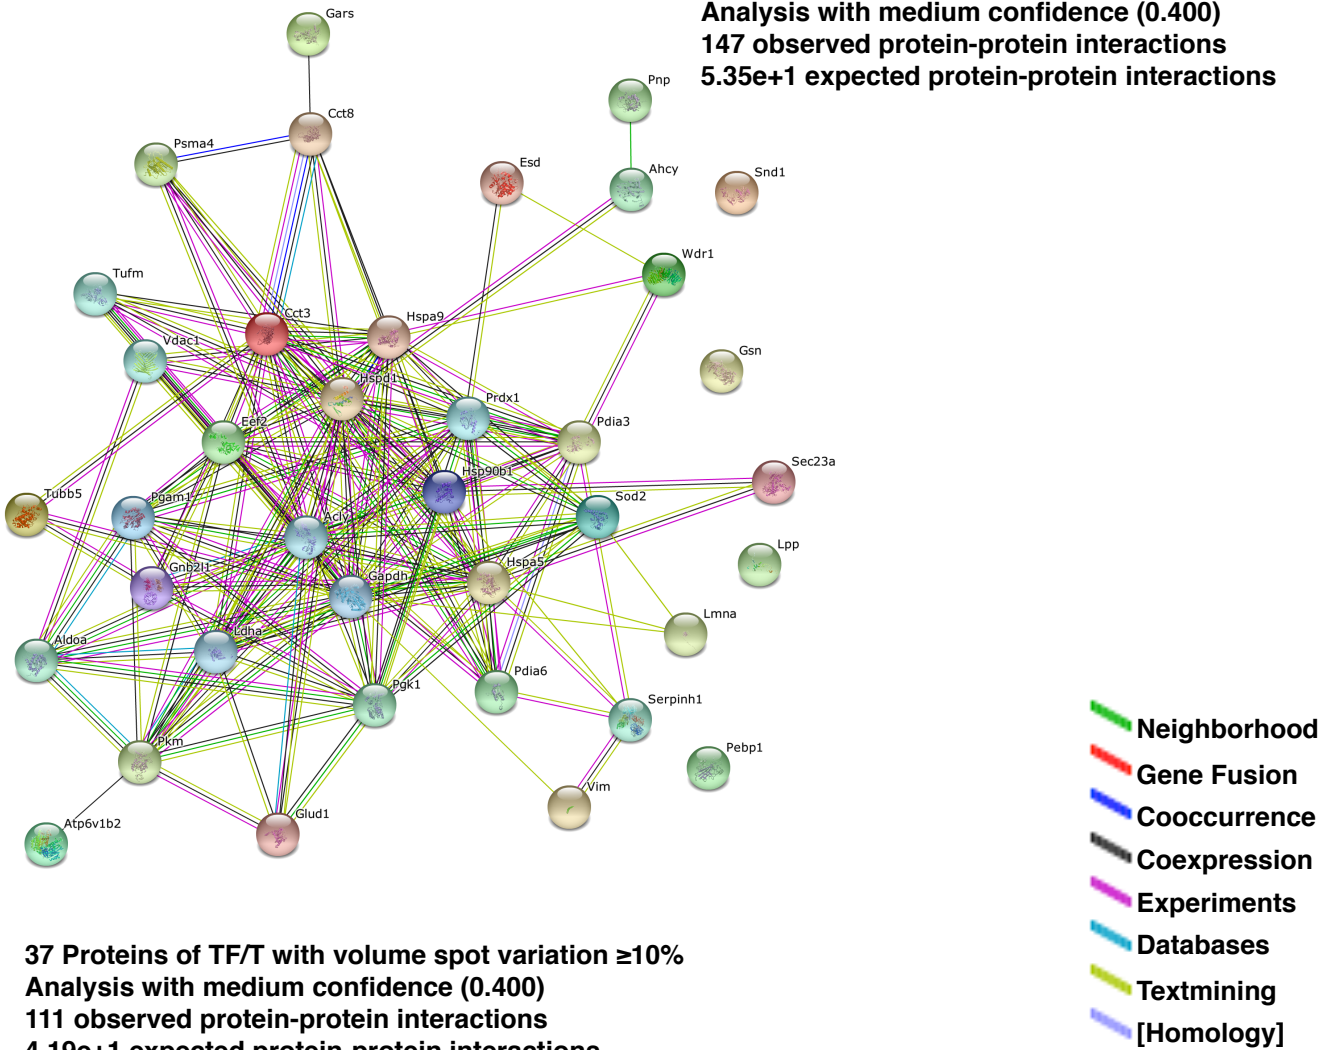**B**

**37 Proteins of TF/T with volume spot variation  $\geq 10\%$**   
**Analysis with medium confidence (0.400)**  
**111 observed protein-protein interactions**  
 **$4.19e+1$  expected protein-protein interactions**

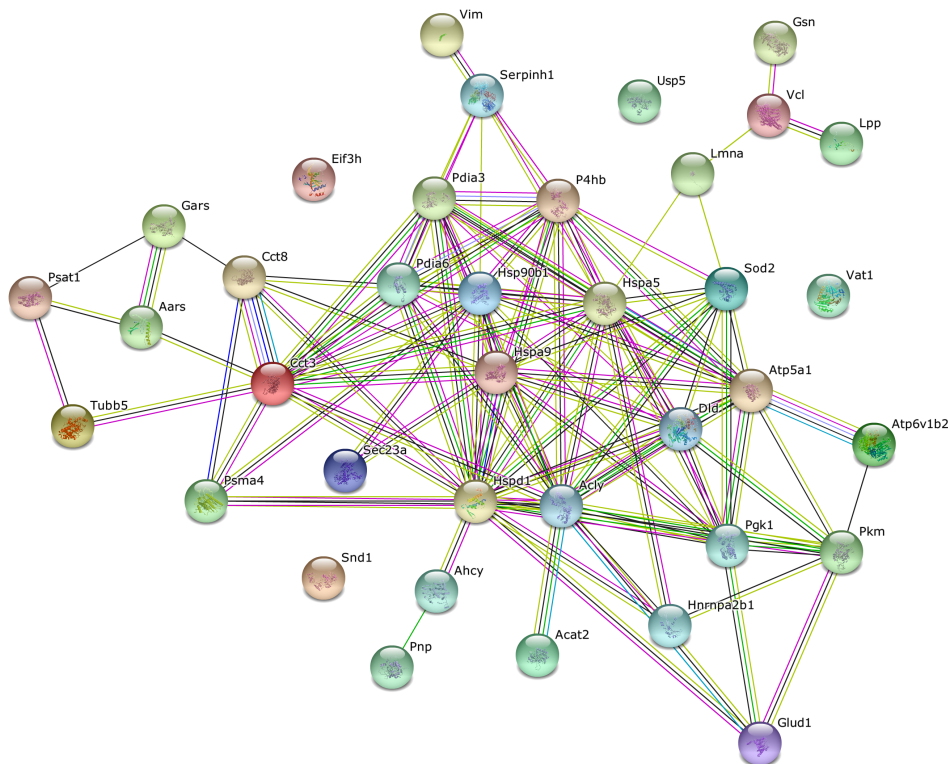

**S4 Fig. Network of predicted associations for all the differentially expressed proteins identified by 2-DIGE.** The STRING analysis of the protein-protein interactions was performed using proteins with spot variation  $\geq 10\%$  in NF/N (A) and TF/T (B) comparisons.
