# Supplementary material for: Protein Kinase A Activation Promotes Cancer Cell Resistance to Glucose Starvation and Anoikis
Source: PubMed Central journal article supplement (PMC4792400; doi:10.1371/journal.pgen.1005931), 2016-03-15
Supplement: pgen.1005931.s006.pdf [file pgen.1005931.s006.pdf]

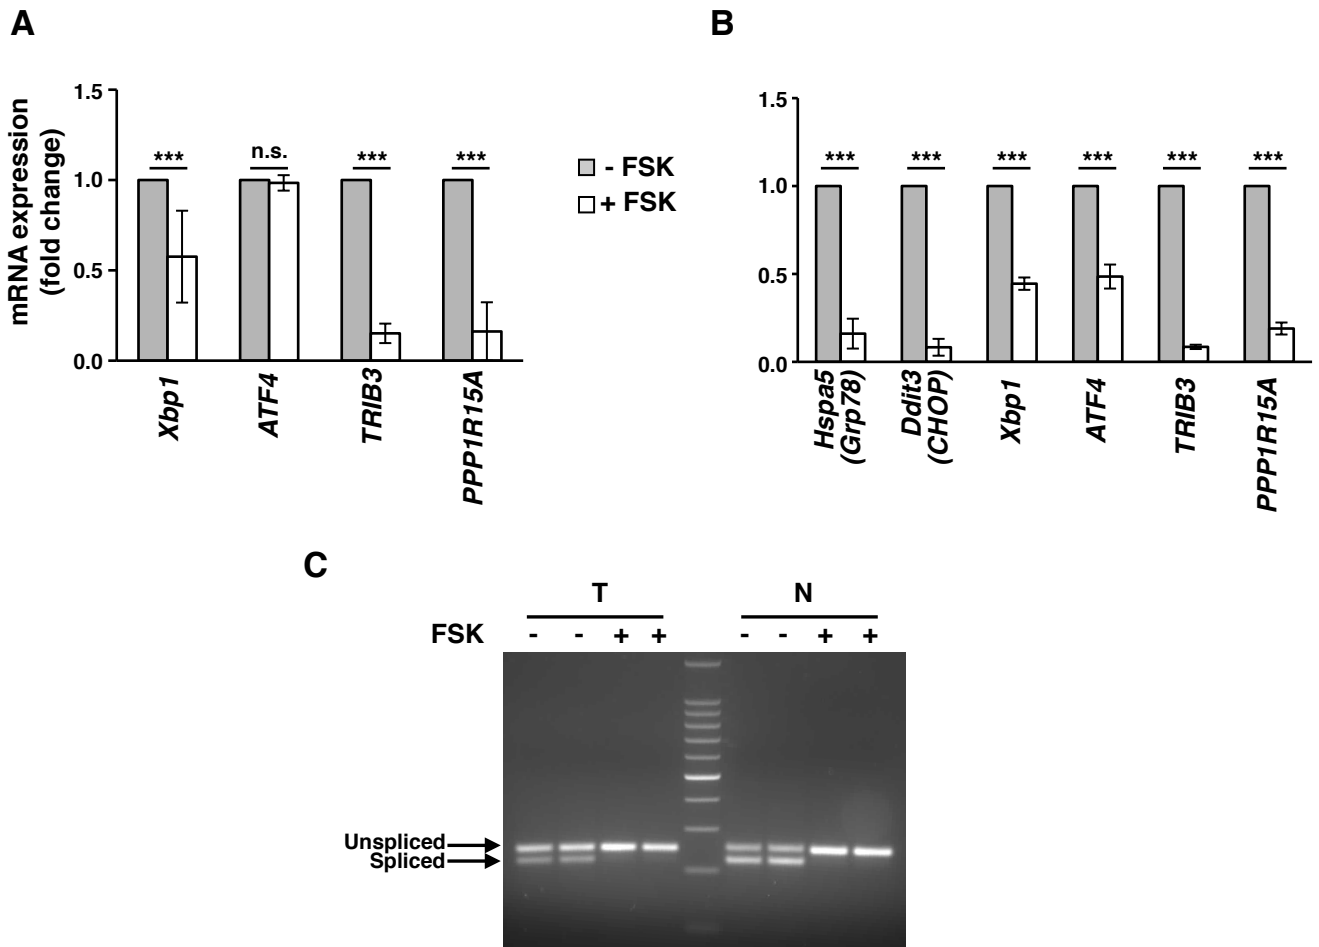

**S6 Fig. The FSK treatment attenuates UPR in both Normal and Transformed cells.** The analysis shown here was performed in cells cultured for 72h in LG and daily treated with DMSO or 10 $\mu$ M FSK. **A-B** mRNA expression of UPR-related genes was analyzed by qPCR for Transformed (A) and Normal (B) cells. mRNA expression levels in FSK-treated cells are reported as change (n-fold) with respect to the amount of relative mRNA expressed in untreated cells, using  $\beta$ -actin mRNA as internal control. **C** Agarose gel electrophoresis was performed to detect the unspliced and spliced forms of *Xbp1*. All data represent the average of three independent experiments. The error bar indicates the standard deviation while the asterisks indicate statistical significance determined by Student's t-test (\* $p$ <0.05; \*\* $p$ <0.01; \*\*\* $p$ <0.001; n.s., not significant).
