# Supplementary material for: Protein Kinase A Activation Promotes Cancer Cell Resistance to Glucose Starvation and Anoikis
Source: PubMed Central journal article supplement (PMC4792400; doi:10.1371/journal.pgen.1005931), 2016-03-15
Supplement: pgen.1005931.s007.pdf [file pgen.1005931.s007.pdf]

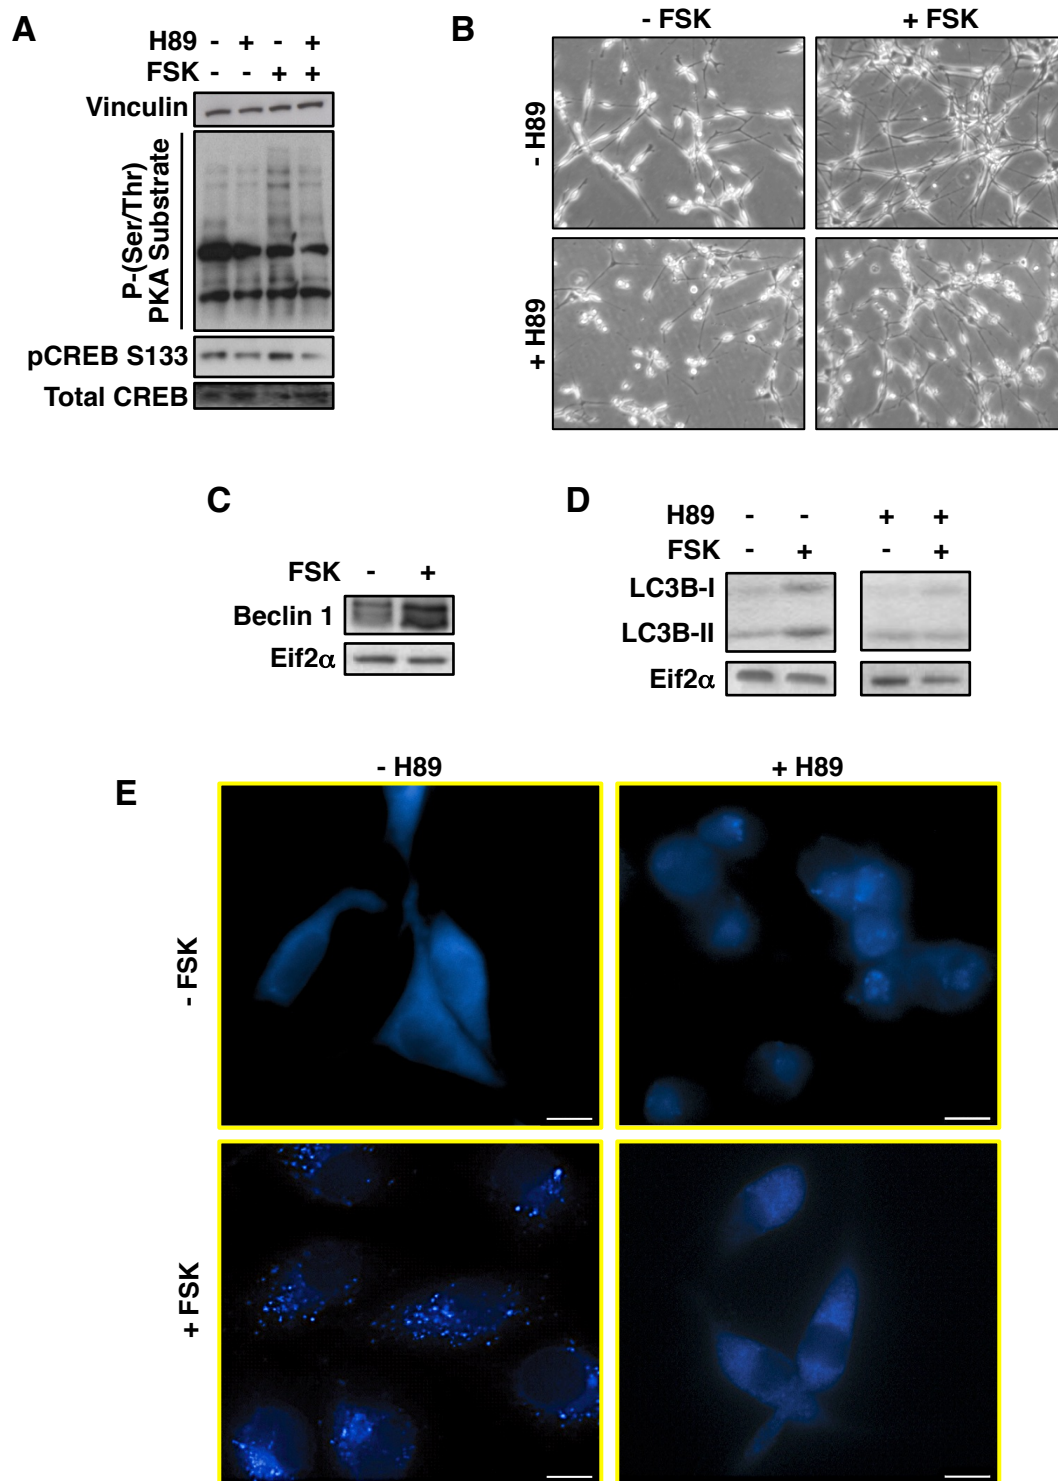

**S7 Fig. The induction of the PKA pathway mediates the autophagy activation in Transformed cells in glucose deprivation. A** PKA activation was evaluated by Western blot analysis of p-(Ser/Thr) PKA substrates and pCREB S133 in Transformed cells daily treated with FSK and/or 2 $\mu$ M H89. **B** The cellular morphology of the cells -/+ FSK and -/+H89 was observed at 96h of culture and representative microscopy images are shown. **C-E** Different analyses were performed to evaluate the autophagy in Transformed cells -/+FSK and -/+H89. **C** Western blot analysis of Beclin1 expression level in cells -/+FSK. **D-E** Evaluation of LC3B-I conversion in LC3B-II by Western blot (D) and staining with 50 $\mu$ M MDC (E). Precisely, in these last analyses (72h of culture) the cells were treated with FSK 1h before the addition of 10 $\mu$ M H89 to -/+FSK samples and then were collected after additional 9h. The cells with MDC were analyzed using fluorescence microscopy at 60X magnification. Scale bar 10 $\mu$ m. All data are representative images of three independent experiments.
