# Supplementary material for: Protein Kinase A Activation Promotes Cancer Cell Resistance to Glucose Starvation and Anoikis
Source: PubMed Central journal article supplement (PMC4792400; doi:10.1371/journal.pgen.1005931), 2016-03-15
Supplement: pgen.1005931.s008.pdf [file pgen.1005931.s008.pdf]

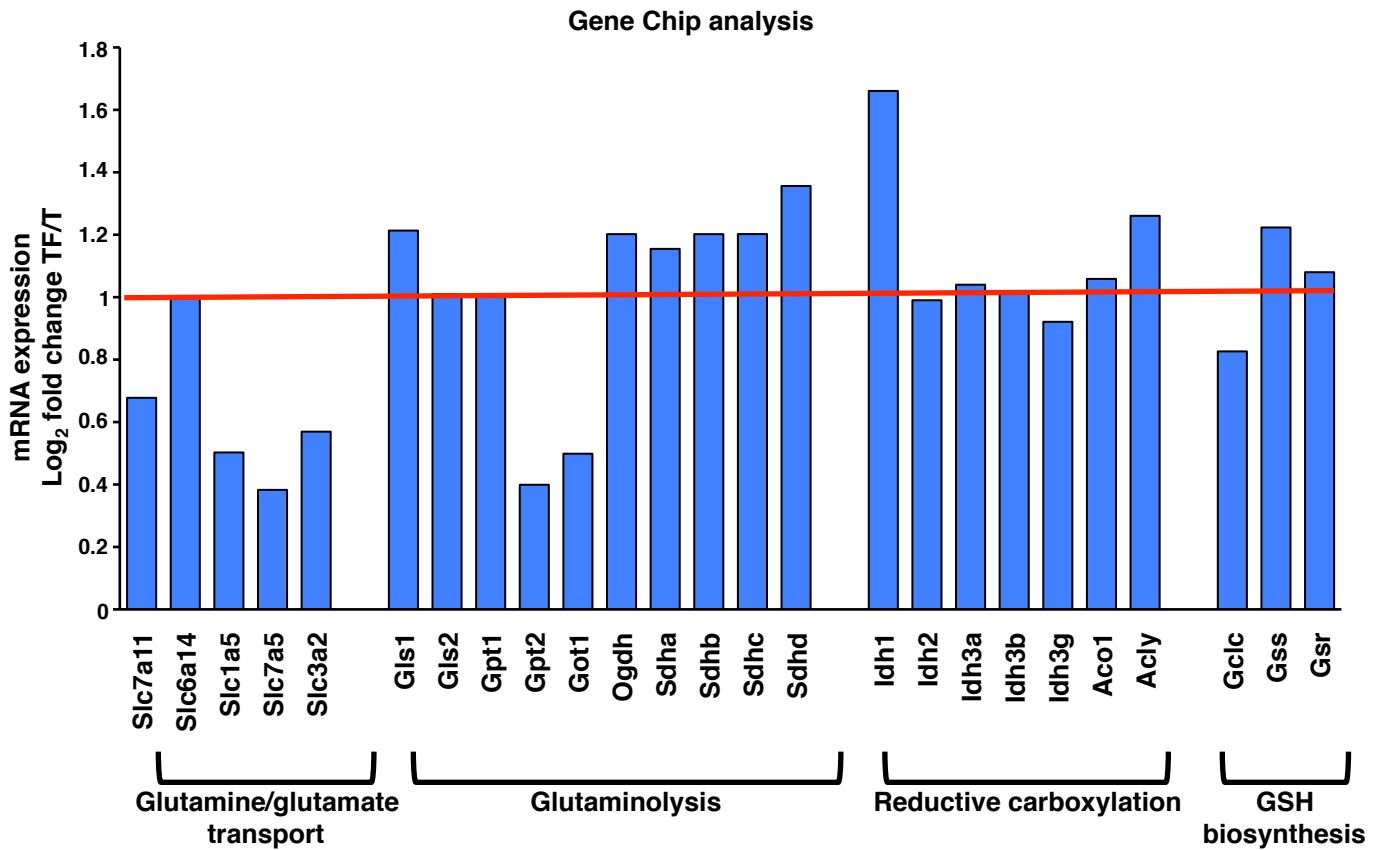

**S8 Fig. The treatment with FSK induces a relevant change in the expression of genes related to the glutamine metabolism.** Transcriptional data from microarray analysis regarding glutamine metabolism-related genes in Transformed cells at 72h of culture in LG, daily treated with DMSO or FSK. Data express the ratio in TF/T comparison.
