# Supplementary material for: Protein Kinase A Activation Promotes Cancer Cell Resistance to Glucose Starvation and Anoikis
Source: PubMed Central journal article supplement (PMC4792400; doi:10.1371/journal.pgen.1005931), 2016-03-15
Supplement: pgen.1005931.s025.pdf [file pgen.1005931.s025.pdf]

## S2 Text

### List of primers used for qPCR amplification of target genes

#### Protein Kinase A Activation Promotes Cancer Cell Resistance to Glucose Starvation and *Anoikis*

Roberta Palorini<sup>1,2,3</sup>¶, Giuseppina Votta<sup>1,2</sup>¶, Yuri Pirola<sup>4</sup>, Humberto De Vitto<sup>1</sup>, Sara De Palma<sup>5</sup>, Cristina Airoidi<sup>1</sup>, Michele Vasso<sup>5</sup>, Francesca Ricciardiello<sup>1</sup>, Pietro Paolo Lombardi<sup>1</sup>, Claudia Cirulli<sup>1</sup>, Raffaella Rizzi<sup>4</sup>, Francesco Nicotra<sup>1</sup>, Karsten Hiller<sup>3</sup>, Cecilia Gelfi<sup>5,6</sup>, Lilia Alberghina<sup>1,2</sup>, Ferdinando Chiaradonna<sup>1,2\*</sup>

**Table A:** List of primers used for qPCR of target genes in Normal and Transformed cells

| Primer          | Forward (5'→3')        | Reverse (5'→3')       |
|-----------------|------------------------|-----------------------|
| <i>I8S</i>      | ttgacggaagggcaccacca   | gcaccaccaccacggaatcg  |
| <i>HSPA5</i>    | agtgggtggcactaatggag   | caatccttgcttgatgctga  |
| <i>DDIT3</i>    | catacaccaccacactgaaag  | ccgtttcctagtctctcctgc |
| <i>Xbp1</i>     | ctgacgaggttcagaggtg    | agcagactctggggaaggac  |
| <i>ATF4</i>     | tcgatgctctgttcgaatg    | ggcaacctggtcgacttta   |
| <i>TRIB3</i>    | gatgccaagtgtccagtct    | cttgctctggtccaaaagg   |
| <i>PPP1R15A</i> | aggaccccgagattcctcta   | cctggaatcaggggtaaggt  |
| <i>Slc1a5</i>   | gactctgttagaccctg      | cagagaagctggaccatggt  |
| <i>GLS</i>      | gctgtgctctattgaagtgaca | ttgggcagaaaccaccatta  |
| <i>GOT1</i>     | ccatctttgtcctccatgcct  | agcccgaagtcttgagaagg  |
| <i>IDH1</i>     | gctggcctttgtatctcage   | ctgactgcacatccccatcgt |
| <i>GSS</i>      | ggttctctggacaaaaccga   | caccttctagtcccagcca   |

**Table B:** List of primers used for qPCR of target genes in MDA-MB-231 and MIA PaCa-2 cells

| Primer        | Forward (5'→3')         | Reverse (5'→3')           |
|---------------|-------------------------|---------------------------|
| <i>ACTIN</i>  | tcatgaagtgtgacgttgaca   | cctagaagcatttgcggtgac     |
| <i>HSPA5</i>  | cggctactatgaagcccg      | catctgggtttatgccacgg      |
| <i>DDIT3</i>  | ccactcttgaccctgcttct    | tggttctcccttggttctcc      |
| <i>Slc1a5</i> | tgcgtggaggagaataatgg    | ggatgatggccagagtgagga     |
| <i>GLS</i>    | tggtggcctcaggtgaaaat    | ccaagctaggtaacagaccctggtt |
| <i>GOT1</i>   | ggagcagtggaagcagattgc   | agcccgaagtcttgagaagg      |
| <i>IDH1</i>   | tggctctgtctaaggggttg    | accatgctgctgatgagcct      |
| <i>GSS</i>    | ggaacatccatgtgatccgacga | ccttcttagtcccagccagct     |
