# Supplementary material for: Protein Kinase A Activation Promotes Cancer Cell Resistance to Glucose Starvation and Anoikis
Source: PLoS Genet. 2016 Mar 15;12(3):e1005931. doi: 10.1371/journal.pgen.1005931 (PMC4792400; doi:10.1371/journal.pgen.1005931)
Supplement: S2 Table — The two spreadsheets show the mass spectrometry data, the UniProtKB accession number and percentage of the volume spot variation. (XLS) [file pgen.1005931.s018.xls]

## Sheet: Description
S2 Table. Proteins identified by mass spectrometry in the two comparisons NF/N and TF/T.
The two spreadsheets shown the mass spectrometry data, the UniProtKB accession number and percentage of the volume spot variation.

## Sheet: NF vs N
Protein name	Gene name	% of volume variation NF/N	UniProtKB accession	Theoretical pI	Theoretical MW	MASCOT protein score	Coverage (%)	Matched/searched peaks	MSMS	MS/MS score	m/z	z
Purine nucleoside phosphorylase	Pnp	154	P23492	5.78	32277.1	165	45.4	15/25	134DHINLPGFCGQNPLR148	64	1737.8712	1
phosphatidylethanolamine-binding protein 1	Pebp1	54	P70296	5.19	20830.4	103	43.3	8/19	94GNDISSGTVLSDYVGSGPPSGTGLHR119	186	2530.2858	1
Pyruvate kinase PKM	Pkm	51	P52480	7.17	57844.9	94	27.5	10/26	74LNFSHGTHEYHAETIK89	70	1883.9508	1
phosphoglycerate mutase 1	Pgam1	47	Q9DBJ1	6.67	28832	171	50	15/26	11HGESAWNLENR21	88	1312.6168	1
S-formylglutathione hydrolase	Esd	46	Q9R0P3	6.7	31319.6	150	47.9	11/24	32FAVYLPPQAESGK44	58	1406.7554	1
Gelsolin	Gsn	41	P13020	5.83	85941.6	107	18.1	11/21	127HVVPNEVVVQR137	38	1275.7180	1
Pyruvate kinase PKM	Pkm	39	P52480	7.17	57844.9	240	47.5	13/37	476DAVLNAWAEDVDLR489	130	1586.8015	1
S-formylglutathione hydrolase	Esd	38	Q9R0P3	6.7	31319.6	95	27.7	7/17	32FAVYLPPQAESGK44	70	1406.7120	1
Phosphoglycerate kinase 1	Pgk1	37	P09411	8.02	44550.5	179	53.7	15/31	200ALESPERPFLAILGGAK216	60	1769.0299	1
ATP-citrate synthase	Acly	34	Q91V92	7.13	119728	132	15.3	12/16	583TIAIIAEGIPEALTR597	45	1567.9025	1
Gelsolin	Gsn	33	P13020	5.83	85941.6	96	17.1	11/28	127HVVPNEVVVQR137	92	1275.7151	1
protein transport protein Sec23A	Sec23a	33	Q01405	6.64	86161.8	118	14.9	9/12	705YIDTEHGGSQAR716	46	1333.6401	1
L-lactate dehydrogenase A chain	Ldha	32	P06151	7.61	36498.5	124	30.8	11/20	196SLNPELGTDADKEQWK211	56	1830.8852	1
Glyceraldehyde-3-phosphate dehydrogenase	Gapdh	31	P16858	8.44	35810	116	25.5	9/16	308LISWYDNEYGYSNR321	101	1779.8101	1
Elongation factor 2	Eef2	31	P58252	6.41	95314	106	11.8	13/19	300VFDAIMNFR308	51	1112.5877	1
Superoxide dismutase [Mn], mitochondrial	Sod2	31	P09671	8.8	24602.9	76	33	15/22	54HHAAYVNNLNATEEK68	111	1710.8270	1
Fructose-bisphosphate aldolase A	Aldoa	30	P05064	8.3	39355.9	210	44.9	15/20	88ADDGRPFPQVIK99	52	1342.7206	1
Peroxiredoxin-1	Prdx1	26	P35700	8.26	22176.5	254	59.8	18/33	141QITINDLPVGR151	47	1225.7022	1
Glyceraldehyde-3-phosphate dehydrogenase	Gapdh	20	P16858	8.44	35810	126	29.7	11/25	308LISWYDNEYGYSNR321	101	1779.8173	1
V-type proton ATPase subunit B, brain isoform	Atp6v1b2	15	P62814	5.57	56550.8	214	36.6	15/17	461NFITQGPYENR471	78	1338.6620	1
proteasome (prosome, macropain) subunit, alpha type 4	Psma4	14	Q9R1P0	7.58	29470.8	119	37.5	9/16	55LLDEVFFSEK64	26	1226.6273	1
staphylococcal nuclease domain-containing protein 1	Snd1	14	Q78PY7	7.08	102088	145	16.8	14/21	716NDISSHPPVEGSYAPR731	86	1725.8636	1
Lipoma-preferred partner homolog	Lpp	12	Q8BFW7	7.19	65890.7	102	18.3	10/16	297YYEPYYAAGPSYGGR311	53	1713.7993	1
tubulin, beta 5	Tubb5	11	P99024	4.78	49670.8	313	66.2	26/41	381ISEQFTAMFR390	72	1229.5980	1
Vinculin	Vcl	8	Q64727	5.77	116717	160	23.3	18/28	179QQELTHQEHR188	57	1305.6350	1
Synaptic vesicle membrane protein VAT-1 homolog	Vat1	4	Q62465	5.95	43096.6	129	29.2	10/18	123LVALYNQGHIKPR135	63	1508.8913	1
acetyl-CoA acetyltransferase, cytosolic	Acat2	4	Q8CAY6	7.16	41297.7	133	35	11/28	81AGHFDKEIVPVLVSSR96	129	1753.9720	1
Eukaryotic translation initiation factor 3 subunit H	Eif3h	2	Q91WK2	6.19	39832.2	84	29.3	6/11	304LFKPHQAPAR313	41	1164.6540	1
Protein disulfide-isomerase	P4hb	0	P09103	4.77	57058.5	250	42.5	20/31	84VDATEESDLAQQYGVR99	152	1780.8751	1
Phosphoserine aminotransferase	Psat1	0	Q96255	8.25	47359.3	129	33.5	12/29	98SADYVVTGAWSAK110	63	1354.6984	1
dihydrolipoyl dehydrogenase, mitochondrial precursor	Dld	-3.84615	O08749	7.99	54272.3	200	30.3	15/18	483VCHAHPTLSEAFR495	87	1524.7677	1
Tryptophanyl-tRNA synthetase	Wars	-4.7619	P32921	6.44	54357.9	104	28.5	10/28	437TLIDVLQPLIAEHQAR452	95	1817.0750	1
T-complex protein 1 subunit beta	Cct2	-4.7619	Q940P8	5.59	57286	112	23.6	11/23	377GATQQILDEAER388	50	1330.6764	1
Alanyl-tRNA synthetase, cytoplasmic	Aars	-5.66038	Q8BGQ7	5.45	106909	138	18.1	14/20	684AVFDETYPDPVR695	48	1408.6872	1
Prelamin-A/C	Lmna	-6.54206	P48678	6.54	74237.6	151	26.7	15/23	428SSFSQHAR435	47	919.4471	1
ATP synthase subunit alpha, mitochondrial precursor	Atp5a1	-7.40741	Q03265	9.22	59752.6	189	32.9	17/25	335EAYPGDVFYLHSR347	65	1553.7509	1
heterogenous nuclear ribonucleoprotein A2/B1	Hnrnpa2b1	-7.40741	O88569	8.97	37402.7	190	42.8	12/14	202GGGGNFGPGPGSNFR216	64	1377.6622	1
ubiquitin carboxyl-terminal hydrolase 5	Usp5	-7.40741	P56399	4.89	95833.3	194	18.2	15/17	163KQEVQAWDGEVR174	46	1444.7406	1
annexin A2	Anxa2	-8.25688	P07356	7.55	38676.2	196	48.7	17/36	314SLYYYIQQDTK324	66	1421.7010	1
Endoplasmin	Hsp90b1	-9.90991	P08113	4.74	92475.8	316	32.4	33/41	512FQSSHHSTDITSLDQYVER530	91	2250.0574	1
guanine nucleotide binding protein (G protein), beta polypeptide 2-like 1	Gnb2l1	-11.5044	P68040	7.6	35076.7	156	43.5	12/32	140YTVQDESHSEWVSCVR155	131	1981.8809	1
glutamate dehydrogenase 1	Glud1	-11.5044	P26443	8.05	61336.8	215	36.4	22/30	481HGGTIPVVPTAEFQDR496	62	1723.9039	1
stress-70 protein, mitochondrial	Hspa9	-12.2807	P38647	5.81	73461.2	249	36.5	20/23	378SDIGEVILVGGMTR391	46	1446.7580	1
elongation factor Tu, mitochondrial isoform 1	Tufm	-13.7931	Q8BFR5	7.23	49508.3	111	23	8/12	92YEEIDNAPEER102	64	1364.5795	1
Protein disulfide isomerase associated 6	Pdia6	-13.7931	Q922R8	5	48100.4	160	29	11/27	398GSTAPVGGGSFPTITPR414	61	1601.8499	1
matricin (T-complex protein 1 subunit gamma)	Cct3	-13.7931	P80318	6.28	60630	145	25.4	14/20	438AVAQALEVIPR448	47	1166.7226	1
Hspd1 protein	Hspd1	-13.7931	P63038	5.91	60955.5	201	35.9	16/24	61TVIIEQSWGSPK72	84	1344.7220	1
T-complex protein 1 subunit theta	Cct8	-13.7931	P42932	5.43	59555.5	244	34.9	22/30	63LFVTNDAATILR74	50	1333.7508	1
S-adenosyl-L-homocysteine hydrolase	Ahcy	-15.2542	P50247	6.08	47688.2	187	33	17/23	187SKFDNLYGCR196	49	1259.5869	1
WD repeat-containing protein 1	Wdr1	-18.0328	O88342	6.11	66406.7	124	35.6	13/39	8VFASLPQVER17	35	1145.6556	1
Glycine--tRNA ligase	Gars	-19.3548	Q9CZD3	6.24	81877.8	110	17.3	11/19	309LPFAAAQIGNSFR321	47	1391.7748	1
voltage-dependent anion channel 1	Vdac1	-19.3548	Q60932	8.62	30755.5	162	45.9	11/23	225YQVDPDACFSAK236	52	1400.6152	1
Protein disulfide-isomerase A3	Pdia3	-20.6349	P27773	5.88	56678.4	132	27.1	14/36	148FISDKDASVVGFFR161	60	1587.8634	1
Prelamin-A/C	Lmna	-21.2598	P48678	6.54	74237.6	356	46.2	26/26	428SSFSQHAR435	51	919.4463	1
78 kDa glucose-regulated protein	Hspa5	-21.875	P20029	5.07	72422.1	295	41.8	29/44	62ITPSYVAFTPEGER75	84	1566.7789	1
Prelamin-A/C	Lmna	-23.6641	P48678	6.54	74237.6	313	39.1	23/24	428SSFSQHAR435	57	919.4490	1
Prelamin-A/C	Lmna	-24.812	P48678	6.54	74237.6	268	35.5	21/25	428SSFSQHAR435	40	919.4301	1
Protein disulfide-isomerase A3	Pdia3	-25.9259	P27773	5.88	56678.4	127	31.1	13/29	449GFPTIYFSPANK460	69	1341.7139	1
Serpin H1 precursor	Serpinh1	-26.4706	P19324	8.88	46533.6	155	32.6	14/17	393DNQSGSLLFIGR404	83	1306.7013	1
Prelamin-A/C	Lmna	-29.078	P48678	6.54	74237.6	429	53.4	34/37	281NSNLVGAAHEELQQSR296	122	1752.8987	1
Vimentin	Vim	-59.1837	P20152	5.05	53687.7	321	56.7	29/40	345LQDEIQNMKEEMAR358	108	1734.8397	1

## Sheet: TF vs T
Protein name	Gene name	% of volume variation TF/T	UniProtKB accession	Theoretical pI	Theoretical MW	MASCOT protein score	Coverage (%)	Matched/searched peaks	MSMS	MS/MS score	m/z	z
Serpin H1	Serpinh1	61	P19324	8.88	46533.6	155	32.6	14/17	393DNQSGSLLFIGR404	83	1306.7013	1
Acetyl-CoA acetyltransferase, cytosolic	Acat2	51	Q8CAY6	7.16	41297.7	133	35	11/28	81AGHFDKEIVPVLVSSR96	129	1753.9720	1
Protein disulfide-isomerase	P4hb	47	P09103	4.77	57058.5	250	42.5	20/31	84VDATEESDLAQQYGVR99	152	1780.8751	1
Gelsolin	Gsn	46	P13020	5.83	85941.6	96	17.1	11/28	127HVVPNEVVVQR137	92	1275.7151	1
Gelsolin	Gsn	43	P13020	5.83	85941.6	107	18.1	11/21	127HVVPNEVVVQR137	38	1275.7180	1
Purine nucleoside phosphorylase	Pnp	41	P23492	5.78	32277.1	165	45.4	15/25	134DHINLPGFCGQNPLR148	64	1737.8712	1
protein transport protein Sec23A	Sec23a	36	Q01405	6.64	86161.8	118	14.9	9/12	705YIDTEHGGSQAR716	46	1333.6401	1
Vinculin	Vcl	29	Q64727	5.77	116717	160	23.3	18/28	179QQELTHQEHR188	57	1305.6350	1
ATP-citrate synthase	Acly	23	Q91V92	7.13	119728	132	15.3	12/16	583TIAIIAEGIPEALTR597	45	1567.9025	1
V-type proton ATPase subunit B, brain isoform	Atp6v1b2	20	P62814	5.57	56550.8	214	36.6	15/17	461NFITQGPYENR471	78	1338.6620	1
staphylococcal nuclease domain-containing protein 1	Snd1	20	Q78PY7	7.08	102088	145	16.8	14/21	716NDISSHPPVEGSYAPR731	86	1725.8636	1
Synaptic vesicle membrane protein VAT-1 homolog	Vat1	19	Q62465	5.95	43096.6	129	29.2	10/18	123LVALYNQGHIKPR135	63	1508.8913	1
Lipoma-preferred partner homolog	Lpp	18	Q8BFW7	7.19	65890.7	102	18.3	10/16	297YYEPYYAAGPSYGGR311	53	1713.7993	1
Superoxide dismutase [Mn], mitochondrial	Sod2	17	P09671	8.8	24602.9	76	33	15/22	54HHAAYVNNLNATEEK68	111	1710.8270	1
proteasome (prosome, macropain) subunit, alpha type 4	Psma4	16	Q9R1P0	7.58	29470.8	119	37.5	9/16	55LLDEVFFSEK64	26	1226.6273	1
Pyruvate kinase PKM	Pkm	12	P52480	7.17	57844.9	94	27.5	10/26	74LNFSHGTHEYHAETIK89	70	1883.9508	1
tubulin, beta 5	Tubb5	12	P99024	4.78	49670.8	313	66.2	26/41	381ISEQFTAMFR390	72	1229.5980	1
Peroxiredoxin-1	Prdx1	8	P35700	8.26	22176.5	254	59.8	18/33	141QITINDLPVGR151	47	1225.7022	1
Pyruvate kinase PKM	Pkm	7	P52480	7.17	57844.9	240	47.5	13/37	476DAVLNAWAEDVDLR489	130	1586.8015	1
phosphatidylethanolamine-binding protein 1	Pebp1	6	P70296	5.19	20830.4	103	43.3	8/19	94GNDISSGTVLSDYVGSGPPSGTGLHR119	186	2530.2858	1
Glyceraldehyde-3-phosphate dehydrogenase	Gapdh	4	P16858	8.44	35810	116	25.5	9/16	308LISWYDNEYGYSNR321	101	1779.8101	1
phosphoglycerate mutase 1	Pgam1	2	Q9DBJ1	6.67	28832	105	42.9	8/21	11HGESAWNLENR21	79	1312.6168	1
S-formylglutathione hydrolase	Esd	2	Q9R0P3	6.7	31319.6	150	47.9	11/24	32FAVYLPPQAESGK44	58	1406.7554	1
Glyceraldehyde-3-phosphate dehydrogenase	Gapdh	0	P16858	8.44	35810	126	29.7	11/25	308LISWYDNEYGYSNR321	101	1779.8173	1
S-formylglutathione hydrolase	Esd	-2.91262	Q9R0P3	6.7	31319.6	95	27.7	7/17	32FAVYLPPQAESGK44	70	1406.7120	1
Fructose-bisphosphate aldolase A	Aldoa	-3.84615	P05064	8.3	39355.9	210	44.9	15/20	88ADDGRPFPQVIK99	52	1342.7206	1
L-lactate dehydrogenase A chain	Ldha	-3.84615	P06151	7.61	36498.5	124	30.8	11/20	196SLNPELGTDADKEQWK211	56	1830.8852	1
Elongation factor 2	Eef2	-4.7619	P58252	6.41	95314	106	11.8	13/19	300VFDAIMNFR308	51	1112.5877	1
annexin A2	Anxa2	-4.7619	P07356	7.55	38676.2	196	48.7	17/36	314SLYYYIQQDTK324	66	1421.7010	1
elongation factor Tu, mitochondrial isoform 1	Tufm	-4.7619	Q8BFR5	7.23	49508.3	111	23	8/12	92YEEIDNAPEER102	64	1364.5795	1
WD repeat-containing protein 1	Wdr1	-4.7619	O88342	6.11	66406.7	124	35.6	13/39	8VFASLPQVER17	35	1145.6556	1
Tryptophan--tRNA ligase, cytoplasmic	Wars	-8.25688	P32921	6.44	54357.9	104	28.5	10/28	437TLIDVLQPLIAEHQAR452	95	1817.0750	1
guanine nucleotide binding protein (G protein), beta polypeptide 2-like 1	Gnb2l1	-9.09091	P68040	7.6	35076.7	156	43.5	12/32	140YTVQDESHSEWVSCVR155	131	1981.8809	1
T-complex protein 1 subunit beta	Cct2	-9.09091	Q940P8	5.59	57286	112	23.6	11/23	377GATQQILDEAER388	50	1330.6764	1
voltage-dependent anion channel 1	Vdac1	-9.09091	Q60932	8.62	30755.5	162	45.9	11/23	225YQVDPDACFSAK236	52	1400.6152	1
Phosphoglycerate kinase 1	Pgk1	-9.90991	P09411	8.02	44550.5	179	53.7	15/31	200ALESPERPFLAILGGAK216	60	1769.0299	1
glutamate dehydrogenase 1	Glud1	-9.90991	P26443	8.05	61336.8	215	36.4	22/30	481HGGTIPVVPTAEFQDR496	62	1723.9039	1
ATP synthase subunit alpha, mitochondrial precursor	Atp5a1	-11.5044	Q03265	9.22	59752.6	189	32.9	17/25	335EAYPGDVFYLHSR347	65	1553.7509	1
Protein disulfide-isomerase A3	Pdia3	-11.5044	P27773	5.88	56678.4	132	27.1	14/36	148FISDKDASVVGFFR161	60	1587.8634	1
Prelamin-A/C	Lmna	-12.2807	P48678	6.54	74237.6	268	35.5	21/25	428SSFSQHAR435	40	919.4301	1
heterogenous nuclear ribonucleoprotein A2/B1	Hnrnpa2b1	-13.0435	O88569	8.97	37402.7	190	42.8	12/14	202GGGGNFGPGPGSNFR216	64	1377.6622	1
Prelamin-A/C	Lmna	-13.0435	P48678	6.54	74237.6	313	39.1	23/24	428SSFSQHAR435	57	919.4490	1
ubiquitin carboxyl-terminal hydrolase 5	Usp5	-13.0435	P56399	4.89	95833.3	194	18.2	15/17	163KQEVQAWDGEVR174	46	1444.7406	1
Prelamin-A/C	Lmna	-13.0435	P48678	6.54	74237.6	429	53.4	34/37	281NSNLVGAAHEELQQSR296	122	1752.8987	1
dihydrolipoyl dehydrogenase, mitochondrial precursor	Dld	-13.7931	O08749	7.99	54272.3	200	30.3	15/18	483VCHAHPTLSEAFR495	87	1524.7677	1
matricin (T-complex protein 1 subunit gamma)	Cct3	-15.2542	P80318	6.28	60630	145	25.4	14/20	438AVAQALEVIPR448	47	1166.7226	1
T-complex protein 1 subunit theta	Cct8	-15.2542	P42932	5.43	59555.5	244	34.9	22/30	63LFVTNDAATILR74	50	1333.7508	1
Eukaryotic translation initiation factor 3 subunit H	Eif3h	-15.9664	Q91WK2	6.19	39832.2	84	29.3	6/11	304LFKPHQAPAR313	41	1164.6540	1
Protein disulfide isomerase associated 6	Pdia6	-15.9664	Q922R8	5	48100.4	160	29	11/27	398GSTAPVGGGSFPTITPR414	61	1601.8499	1
stress-70 protein, mitochondrial	Hspa9	-15.9664	P38647	5.81	73461.2	249	36.5	20/23	378SDIGEVILVGGMTR391	46	1446.7580	1
Prelamin-A/C	Lmna	-17.3554	P48678	6.54	74237.6	210	31.7	17/21	428SSFSQHAR435	49	919.4556	1
Protein disulfide-isomerase A3	Pdia3	-17.3554	P27773	5.88	56678.4	127	31.1	13/29	449GFPTIYFSPANK460	69	1341.7139	1
Prelamin-A/C	Lmna	-19.3548	P48678	6.54	74237.6	151	26.7	15/23	428SSFSQHAR435	47	919.4471	1
Hspd1 protein	Hspd1	-19.3548	P63038	5.91	60955.5	201	35.9	16/24	61TVIIEQSWGSPK72	84	1344.7220	1
S-adenosyl-L-homocysteine hydrolase	Ahcy	-21.875	P50247	6.08	47688.2	187	33	17/23	187SKFDNLYGCR196	49	1259.5869	1
Alanyl-tRNA synthetase, cytoplasmic	Aars	-27.5362	Q8BGQ7	5.45	106909	138	18.1	14/20	684AVFDETYPDPVR695	48	1408.6872	1
Glycine--tRNA ligase	Gars	-33.7748	Q9CZD3	6.24	81877.8	110	17.3	11/19	309LPFAAAQIGNSFR321	47	1391.7748	1
Endoplasmin	Hsp90b1	-34.6405	P08113	4.74	92475.8	316	32.4	33/41	512FQSSHHSTDITSLDQYVER530	91	2250.0574	1
Phosphoserine aminotransferase	Psat1	-39.0244	Q96255	8.25	47359.3	129	33.5	12/29	98SADYVVTGAWSAK110	63	1354.6984	1
78 kDa glucose-regulated protein	Hspa5	-54.3379	P20029	5.07	72422.1	295	41.8	29/44	62ITPSYVAFTPEGER75	84	1566.7789	1
Vimentin	Vim	-72.4518	P20152	5.05	53687.7	321	56.7	29/40	345LQDEIQNMKEEMAR358	108	1734.8397	1
